# Supplementary material
Source: PubMed Central journal article supplement (PMC8359639)

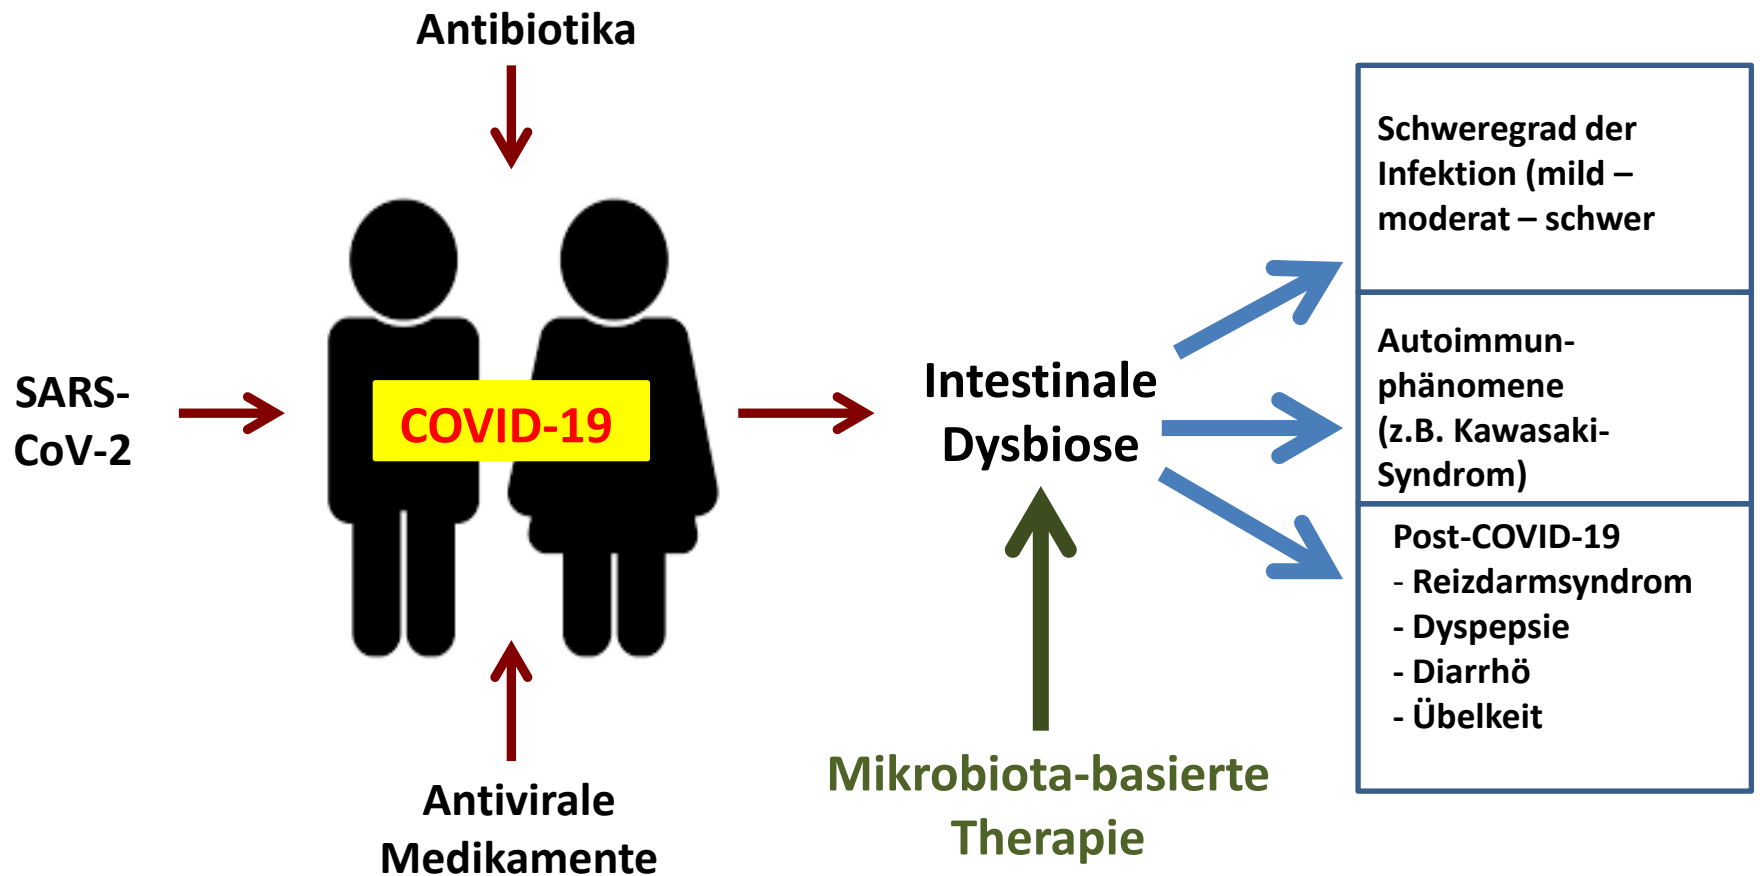

Abb. 2: Eine Mikrobiota-basierte Therapie könnte dabei helfen, die Folgen der Dysbiose zu mildern.

Supplement: 15006_2021_200_MOESM1_ESM.pdf [file 15006_2021_200_MOESM1_ESM.pdf]
